# Supplementary material for: The zebrafish tailbud contains two independent populations of midline progenitor cells that maintain long-term germ layer plasticity and differentiate based on local signaling cues
Source: Oxford University Press journal article supplement (doi:10.1242/dev.129015), 2015-01-01
Supplement: dev129015supp.pdf [file dev129015supp.pdf]

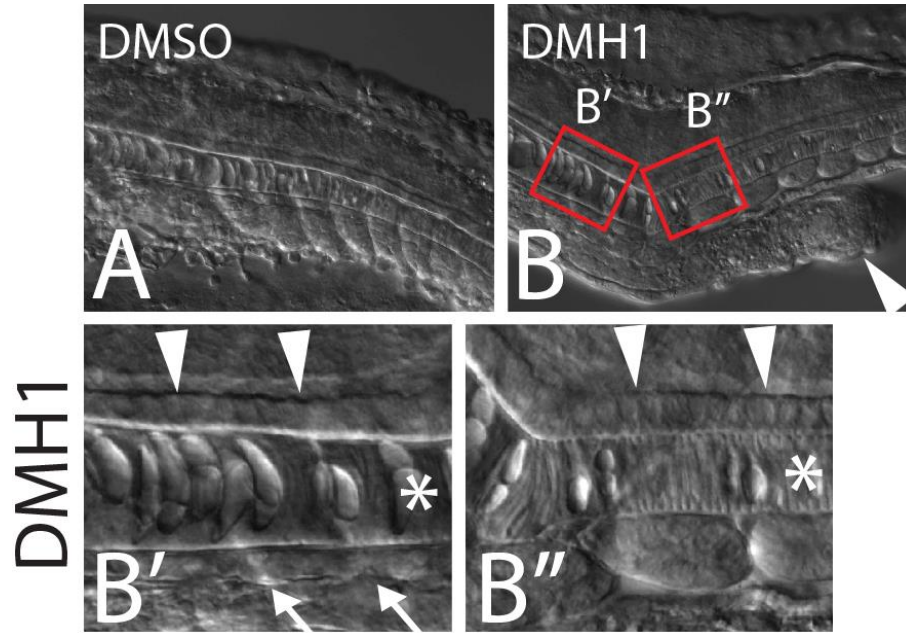

Supplementary Figure S1

Embryos treated with the BMP inhibitor DMH1 exhibit ectopic tails (B, arrowhead). High magnification views of the primary midline reveal that in regions anterior to the ectopic tail, floor plate (arrowheads), notochord (star), and hypochord (arrows) are all present (B'), whereas posterior to the ectopic tail hypochord is absent from the primary midline but floor plate is present (B'').

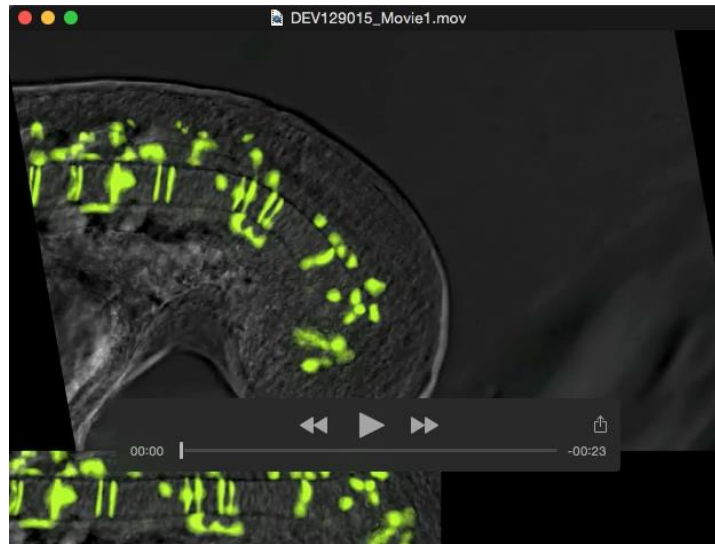

### Supplementary Movie 1

The supplemental movie shows data from time-lapse microphotography of the posterior of wild-type zebrafish embryos during somitogenesis. Green cells were transplanted from other wild-type embryos, which were labeled by injection of fluorescein dextran. Images were acquired approximately every 10 minutes. The lower frame is an alternate presentation of the same data. ImageJ was used to digitally straighten the original image and the frame was cropped to contain only midline structures. The movie will play through the time-lapse twice, the second time with annotation of a cell that will eventually join the notochord labeled in red.
